# Supplementary material
Source: PubMed Central journal article supplement (PMC9170837)
Supplement: NIHMS1753773-supplement-fS1.pdf [file NIHMS1753773-supplement-fS1.pdf]

n=3833, Without All-cause Dementia

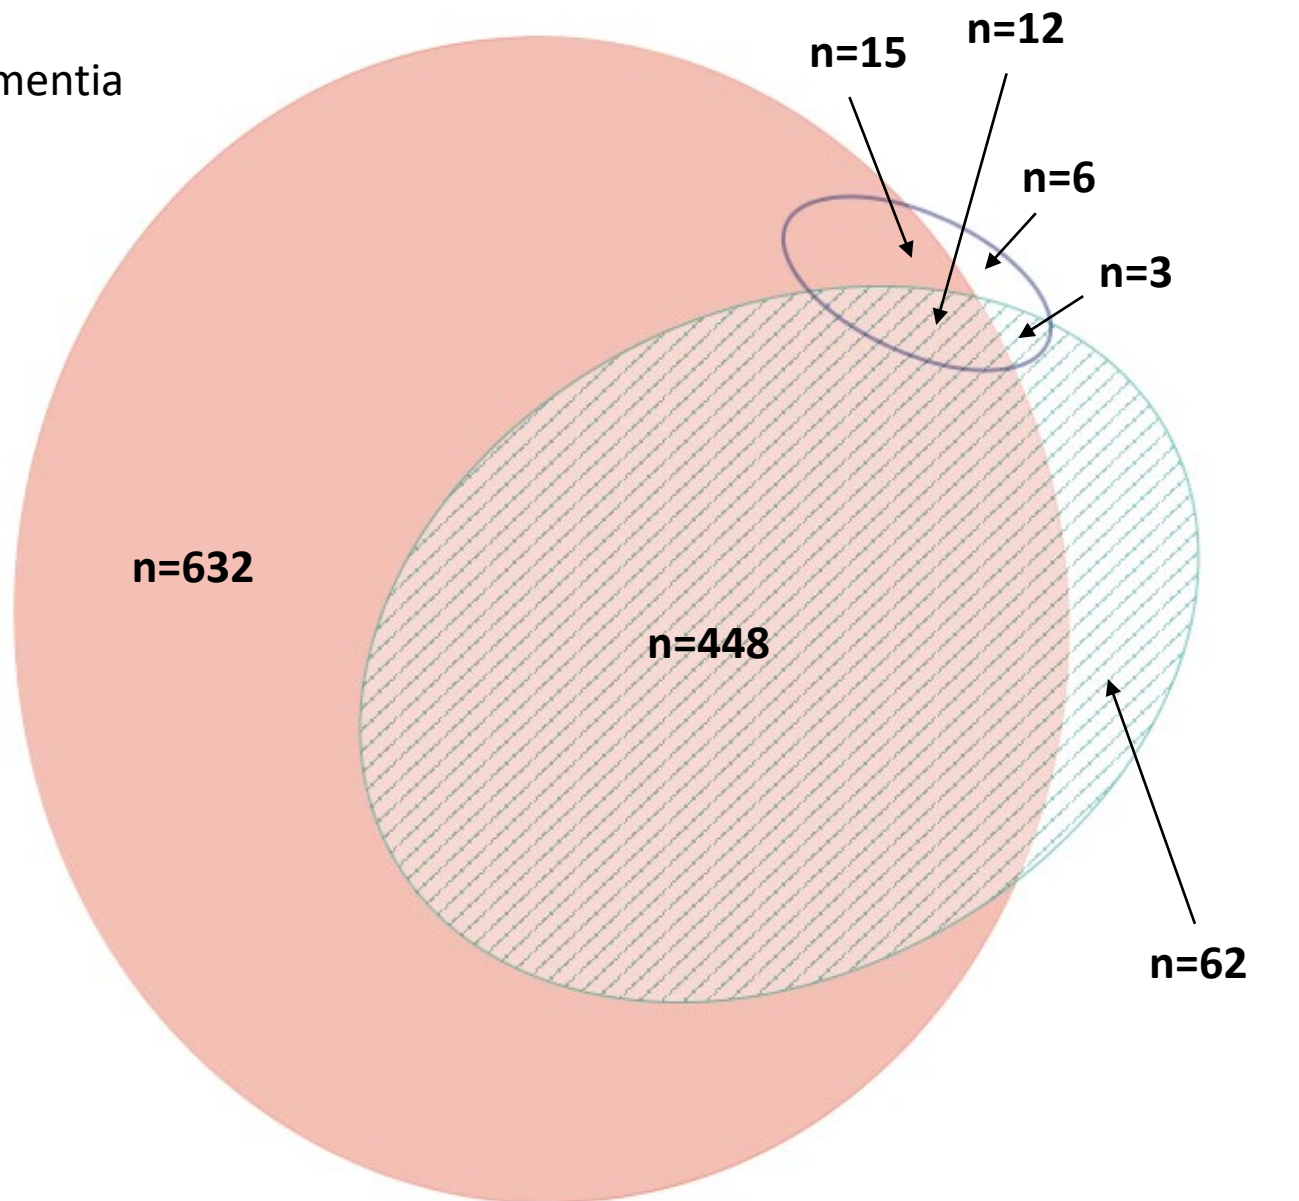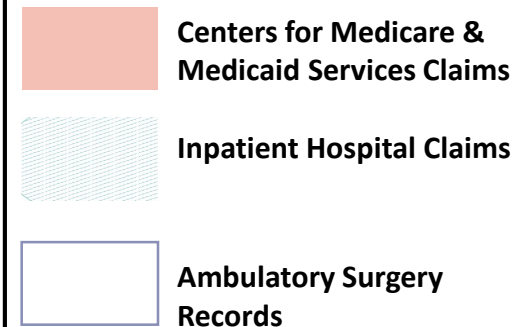

**Supplemental Figure 1:** Venn diagram representing overlap of All-cause Dementia diagnoses in Inpatient, Ambulatory Surgery, and Medicare diagnoses (N=5011).
