# Supplementary material
Source: PubMed Central journal article supplement (PMC9170837)
Supplement: NIHMS1753773-supplement-fS2.pdf [file NIHMS1753773-supplement-fS2.pdf]

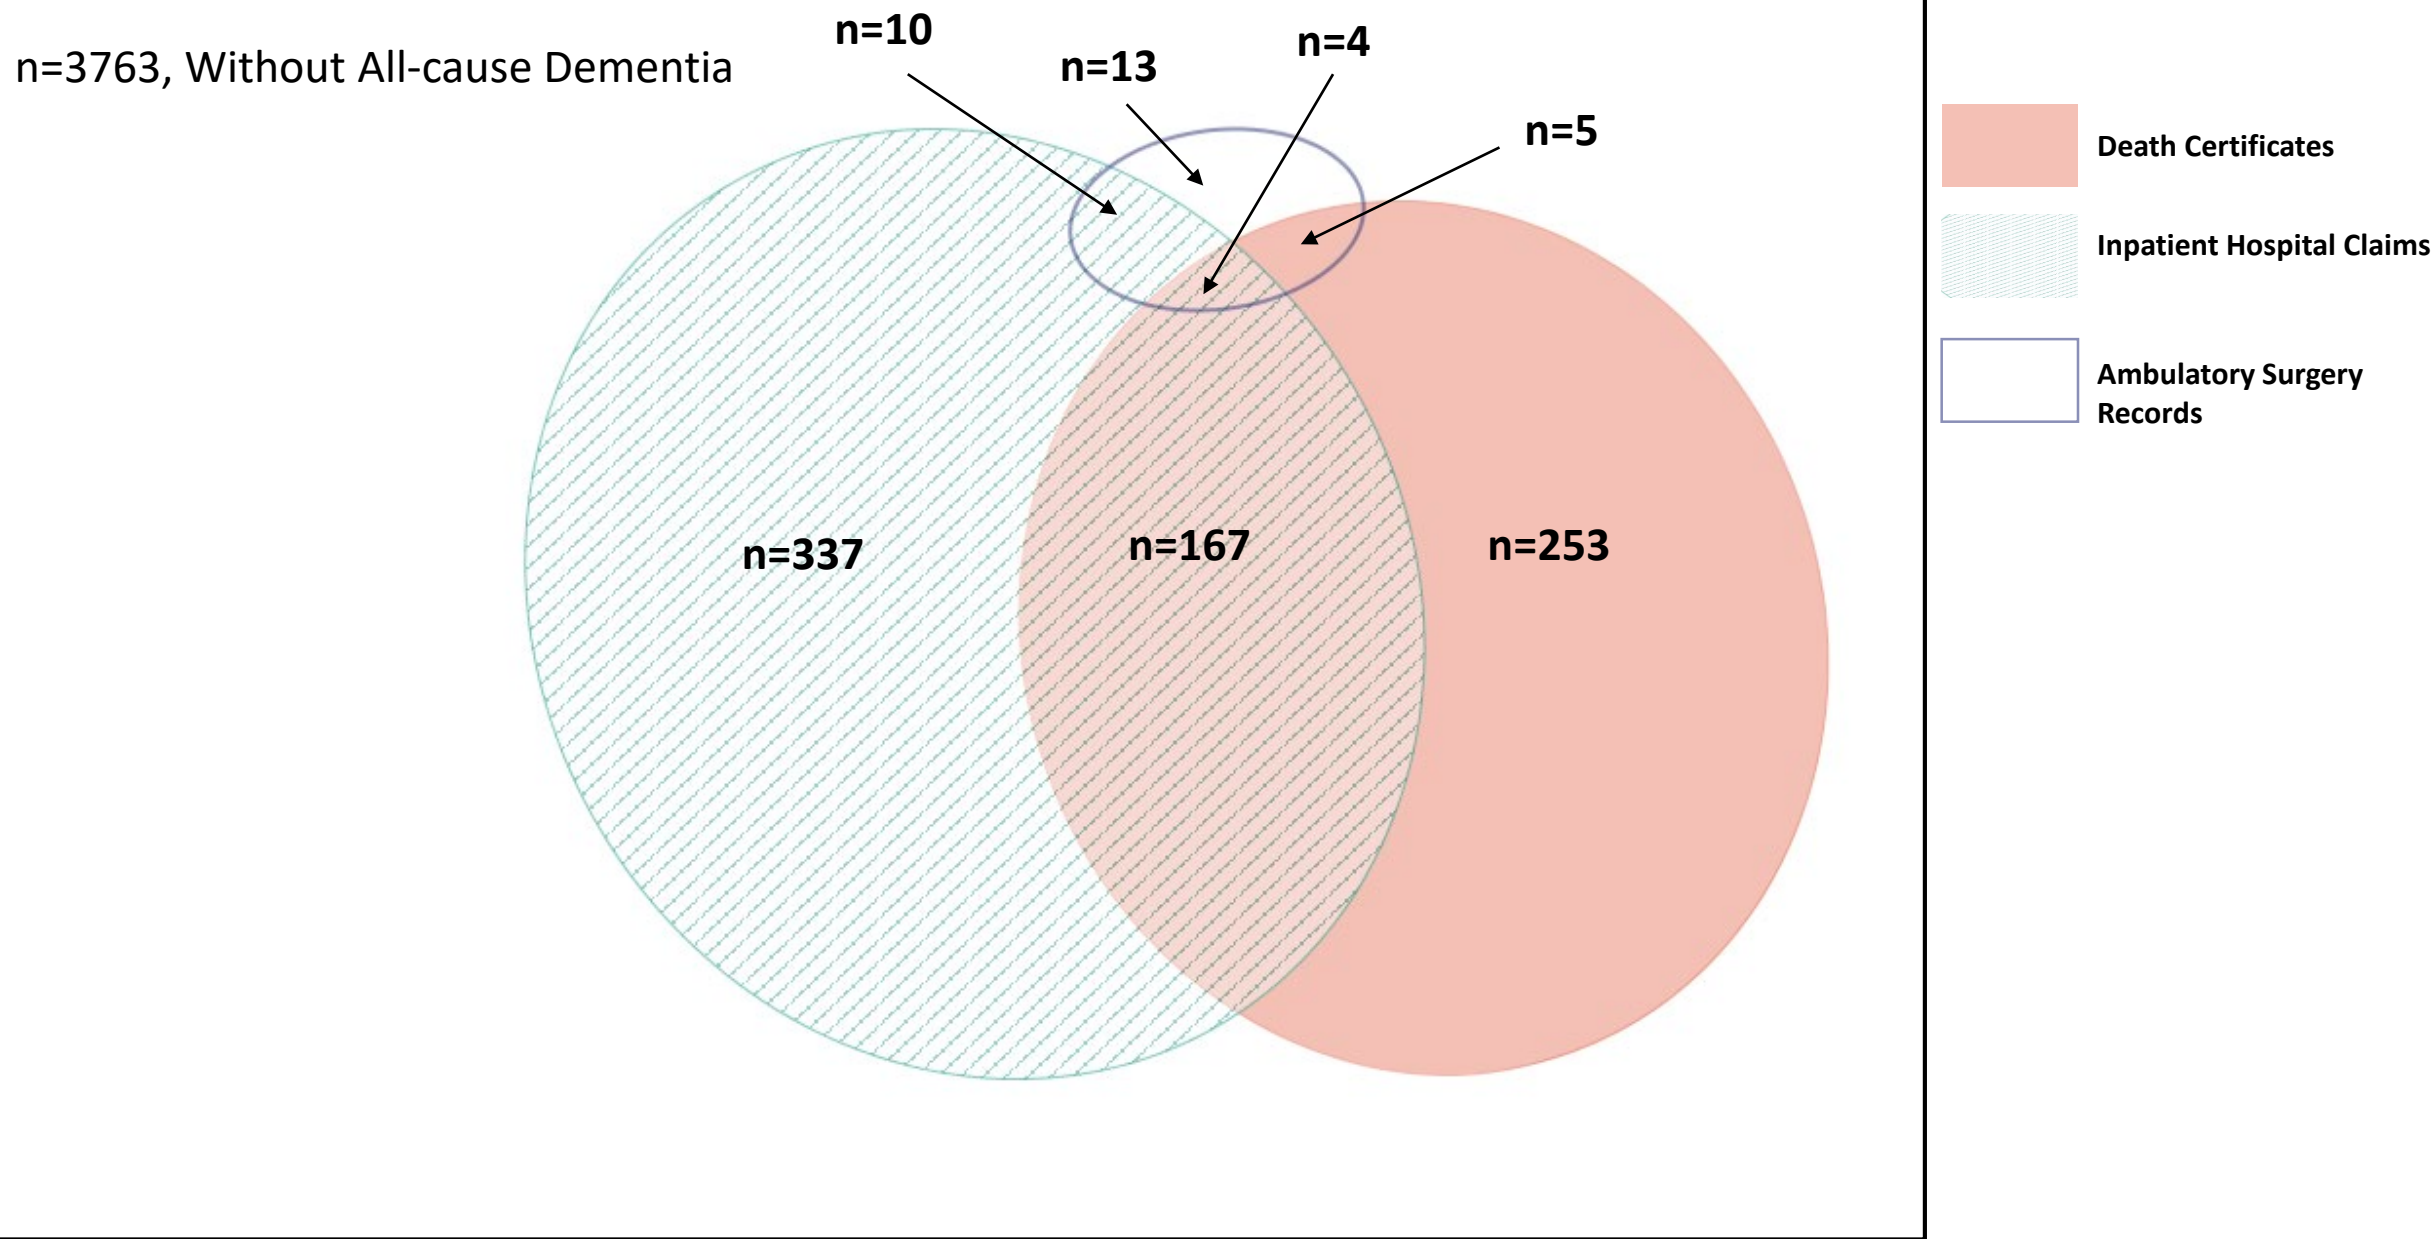

**Supplemental Figure 2:** Venn diagram representing overlap of All-cause Dementia diagnoses in Inpatient, Ambulatory Surgery, and Death Certificates among deceased participants (N=4192).
